# Supplementary material for: Risk of depression and self-harm in teenagers identifying with goth subculture: a longitudinal cohort study
Source: PubMed Central journal article supplement (PMC4698805; doi:10.1016/s2215-0366(15)00164-9), 2015-08-27
Supplement: mmc1.pdf [file mmc1.pdf]

# THE LANCET Psychiatry

## Supplementary appendix

This appendix formed part of the original submission and has been peer reviewed. We post it as supplied by the authors.

Supplement to: Bowes L, Carnegie R, Pearson R, et al. Risk of depression and self-harm in teenagers identifying with goth subculture: a longitudinal cohort study. *Lancet Psychiatry* 2015; published online Aug 28. [http://dx.doi.org/10.1016/S2215-0366\(15\)00164-9](http://dx.doi.org/10.1016/S2215-0366(15)00164-9).

## Variables used to construct an imputation model for missing data analyses.

| Variable                                                             | Age at assessment                                                            | Measure                                                                                                                                                                      | Informant       |
|----------------------------------------------------------------------|------------------------------------------------------------------------------|------------------------------------------------------------------------------------------------------------------------------------------------------------------------------|-----------------|
| Gender                                                               | Birth                                                                        | -                                                                                                                                                                            | Maternal report |
| Goth identification                                                  | 15 years                                                                     | Adapted from the Peer Crowd Questionnaire <sup>1,2</sup>                                                                                                                     | Self-report     |
| Depression                                                           | 15 years                                                                     | DAWBA <sup>3</sup>                                                                                                                                                           | Self-report     |
| Self-harm/ suicidal intent                                           | 15 years                                                                     | CIS-R <sup>4</sup>                                                                                                                                                           | Self-report     |
|                                                                      | 18 years                                                                     | DAWBA <sup>3</sup>                                                                                                                                                           |                 |
| Depressive symptoms                                                  | 10, 13, 16 years                                                             | Short Mood and Feelings Questionnaire <sup>5</sup>                                                                                                                           | Self-report     |
|                                                                      | 11 years                                                                     | Strengths and Difficulties Questionnaire <sup>5</sup>                                                                                                                        | Maternal report |
| Externalizing symptoms                                               | 11 years                                                                     | Strengths and Difficulties Questionnaire <sup>5</sup>                                                                                                                        | Maternal report |
| Child temperament: emotionality/ activity/ shyness and sociability   | 6 years                                                                      | Emotionality, Activity, and Sociability Temperament Scale <sup>6</sup>                                                                                                       | Maternal report |
| Maternal depression in pregnancy                                     | 18 weeks gestation                                                           | Edinburgh Postnatal Depression Scale <sup>7</sup>                                                                                                                            | Maternal report |
| Maternal history of depression                                       | 12 weeks gestation                                                           | Single item (past history of severe depression yes/no)                                                                                                                       | Maternal report |
| Maternal depressive symptoms                                         | 18 weeks and 32 weeks gestation, 8 weeks, 8, 21 & 33 months, 5 years, 6 year | Edinburgh Postnatal Depression Scale <sup>7</sup>                                                                                                                            | Maternal report |
| Maternal education                                                   | Pregnancy                                                                    | Percentage of mothers with a university degree versus without a degree                                                                                                       | Maternal report |
| Paternal education                                                   | Pregnancy                                                                    | Percentage of fathers with a university degree versus without a degree                                                                                                       | Maternal report |
| Parental social class                                                | Pregnancy                                                                    | Lower of mother and father occupational social class, dichotomised into professional, managerial, or skilled professions versus partly or unskilled occupations <sup>8</sup> | Maternal report |
| Cannabis use                                                         | 16 years                                                                     | Cannabis Abuse Screen Test (CAST) <sup>9</sup>                                                                                                                               | Self-report     |
| Peer victimization                                                   | 8 & 10 years                                                                 | Modified version of the Bullying and Friendship Interview Schedule <sup>10</sup>                                                                                             | Self-report     |
| Peer bullying                                                        | 8, 10 and 13 years                                                           | Modified version of the Bullying and Friendship Interview Schedule <sup>10</sup>                                                                                             | Self-report     |
| Early death in family                                                | 5 years                                                                      | Item from Life Events Questionnaire <sup>11, 12</sup>                                                                                                                        | Maternal report |
| Self esteem- global self worth score and scholastic competence score | 8 years                                                                      | Shortened form of Harter's Self Perception Profile for Children <sup>13</sup>                                                                                                | Self-report     |
| Body image                                                           | 13 years                                                                     |                                                                                                                                                                              | Self-report     |

## References

- <sup>1</sup> Mosbach P, Leventhal H. Peer group identification and smoking: implications for intervention. *J Abnorm Psychol* 1988; 97: 238–45.
- <sup>2</sup> La Greca AM, Prinstein MJ, Fetter MD. Adolescent peer crowd affiliation: linkages with health-risk behaviors and close friendships. *J Pediatr Psychol* 2001; 26: 131–43.
- <sup>3</sup> Goodman R, Ford T, Richards H, et al. The development and well-being assessment: description and initial validation of an integrated assessment of child and adolescent psychopathology. *J Child Psychol Psych* 2000; 41: 645–55.
- <sup>4</sup> Lewis G. Assessing psychiatric disorder with a human interviewer or a computer. *J Epidemiol Comm Health* 1994; 48: 207–10.
- <sup>5</sup> Angold A, Costello EJ, Messer SC, et al. The development of a short questionnaire for use in

epidemiological studies of depression in children and adolescents. *Int J Method Psych* 1995; 5: 237–49.

<sup>6</sup>Buss AH, Plomin R. *Temperament: Early developing personality traits*, 1984

<sup>7</sup>Cox JL, Holden JM, Sagovsky R. Detection of postnatal depression. Development of the 10-item Edinburgh postnatal depression scale. *Br J Psychiatry* 1987; 150: 782–86.

<sup>8</sup>Office of Population Censuses and Surveys. *Standard occupational classification*. London: HMSO, 1990.

<sup>9</sup>Legleye S, Karila L, Beck F, Reynaud M. Validation of the CAST, a general population Cannabis Abuse Screening Test. *J. Subst. Use* 2007; 12: 233–242.

<sup>10</sup>Wolke D, Woods S, Bloomfield L, et al. Bullying involvement in primary school and common health problems. *Arch Dis Child* 2001; 85: 197–201.

<sup>11</sup>Barnett BE, Hanna B, Parker G. Life event scales for obstetric groups. *J Psychosom Res* 1983; 27: 313 - 20.

<sup>12</sup>Brown GW, Harris TO. *Life events and illness*. New York: Guilford Press, 1989.

<sup>13</sup>Harter S. *Manual for the self-perception profile for children*. Denver: University of Denver, 1985.
